# Supplementary material for: Apple Growth and Yield in Replant Soils Supplemented by Organic Soil Additives
Source: MDPI journal article supplement (doi:10.3390/agronomy14040678), 2024-03-26
Supplement: s1 [file s1]

**Table S1.** Determination of soil parameters and nutrients and supplements performed according to DIN-standards inhouse and by Eurofins Agricultural Analytics Germany (Jena)

| Determination of | According to                                 |
|------------------|----------------------------------------------|
| Soil class*      | DIN 19682-2 (2014-07)                        |
| Total OS*        | DIN ISO 10694: 1996-08                       |
| Clay content*    | DIN ISO 11277: 2002-08                       |
| Magnesium        | VDLUFA method book volume I, chapter 6.2.4.1 |
| Potassium        | VDLUFA method book volume I, chapter 6.2.1.2 |
| Phosphorum       | VDLUFA method book volume I, chapter 6.2.1.2 |
| pH value         | VDLUFA method book volume I, chapter 5.1.1   |

OS = organic substance; \* determination by Eurofins Agricultural Analytics Germany (Jena); accrediting: DIN EN ISO/IEC 17025:2018 DAkkS D-PL-20226-01-00

**Table S2. (A)** Analysis of pathogenic organisms of the soil samples of sites A, B and C before the experiment (2017); **(B)** number of nematodes per cm<sup>2</sup> soil in samples of soils of sites A, B and C.

**(A)**

| Detected Microorganisms     | DNA-Multiscan hybridisation signal |        |        |
|-----------------------------|------------------------------------|--------|--------|
|                             | Site A                             | Site B | Site C |
| <i>Alternaria</i> sp.       | 2                                  | 2      | 0      |
| <i>Fusarium</i> sp.         | 6                                  | 6      | 4      |
| <i>Fusarium oxysporum</i>   | 2                                  | 2      | 2      |
| <i>Fusarium solani</i>      | 2                                  | 2      | 2      |
| <i>Pythium</i> sp.          | 4                                  | 4      | 4      |
| <i>Pythium sylvaticum</i>   | 2                                  | 4      | 4      |
| <i>Pythium ultimum</i>      | 4                                  | 4      | 0      |
| <i>Verticillium</i> sp.     | 0                                  | 2      | 2      |
| <i>Verticillium dahliae</i> | 0                                  | 2      | 2      |

The intensity of the hybridisation signals is proportional to the amount of DNA (i.e., to the amount of biomass); 0 = not detected; 1–2 = weak; 3–4 = moderate signal; 5–6 = strong signal. Analyses by Scientia Terrae Research Institute, Antwerp, Belgium.

**(B)**

| Nematodes per cm <sup>2</sup> soil         | Site A | Site B | Site C |
|--------------------------------------------|--------|--------|--------|
| <i>Pratylenchus thornei</i>                | 25     | 3      | 49     |
| <i>Tylenchorhynchus</i>                    | 5      | 3      | 4      |
| <i>Paratylenchus</i> spp.                  | 247    | 53     | 18     |
| <i>Meloidogyne hapla</i>                   | 9      | -      | 12     |
| <i>Rotylenchus</i>                         | -      | 1      | -      |
| <i>Heterodera</i>                          | -      | 1      | -      |
| <i>Trypandor</i> / <i>Paratyrychodorus</i> | -      | -      | 8      |

**Table S3.** Analysis of pathogenic organisms (DNA-multiscan) in non-sterilised and sterilised (at 100 °C) soils of sites A, B, and C 12 weeks after plant growth (pot trial 1), median over three singly analysed pots.

| Detected Microorganisms   | Soil A   |      | Soil B   |      | Soil C   |      |
|---------------------------|----------|------|----------|------|----------|------|
|                           | Non-ster | Ster | Non-ster | Ster | Non-ster | Ster |
| <i>Alternaria</i> sp.     | 0        | 0    | 0        | 0    | 0        | 0    |
| <i>Fusarium</i> sp.       | 2        | 0    | 2        | 0    | 2        | 0    |
| <i>Fusarium oxysporum</i> | 2        | 0    | 1        | 0    | 2        | 0    |
| <i>Fusarium solani</i>    | 1        | 0    | 1        | 0    | 0        | 0    |
| <i>Pythium</i> sp.        | 5        | 0    | 2        | 0    | 2        | 0    |
| <i>Pythium irregulare</i> | 3        | 0    | 0        | 0    | 0        | 0    |
| <i>Pythium sylvaticum</i> | 5        | 0    | 2        | 0    | 0        | 0    |
| <i>Pythium ultimum</i>    | 0        | 0    | 2        | 0    | 2        | 0    |
| <i>Stemphylium</i> sp.    | 1        | 2    | 0        | 0    | 0        | 0    |

Non-ster = non-sterilised soil; ster = sterilised soil. Analysis of pathogenic organisms (DNA-multiscan) in soils of sites A, B and C in non-sterilised and sterilised (at 100 °C). Median over three pots.

**Table S4.** Growth increase (GI) of average trunk cross-sectional areas (CSA) per tree (cm<sup>2</sup>) from 2018-2022 in control and treated soils in sites A, B and C.

|             | Site A    | Site B    | Site C    |
|-------------|-----------|-----------|-----------|
| Control     | 5.6 ± 0.2 | 5.3 ± 0.3 | 8.6 ± 1.7 |
| Mc-compost  | 5.6 ± 0.3 | 5.2 ± 0.3 |           |
| Champost    | 5.5 ± 0.2 | 5.6 ± 0.3 | 5.3 ± 0.6 |
| M-dam       | 6.8 ± 0.3 | 7.3 ± 0.5 |           |
| Leonardite  |           |           | 6.7 ± 1.0 |
| M9/Gala     | 5.6 ± 0.2 | 6.6 ± 0.3 |           |
| M9/GalaRed  | 6.4 ± 0.3 |           |           |
| G11/Gala    | 5.5 ± 0.2 | 5.1 ± 0.2 |           |
| G11/GalaRed | 6.1 ± 0.3 |           |           |

± Standard error

**Table S5.** Yield (kg) of apples harvested per tree from 2019 to 2022 in terms of treatments and rootstock/variety combination at sites A and B and from 2020 to 2022 at site C.

|             | Site A    |            |            |            |            |    |
|-------------|-----------|------------|------------|------------|------------|----|
|             | 2019      | 2020       | 2021       | 2022       | 2019-2022  |    |
| Control     | 4.2 ± 0.2 | 9.7 ± 0.4  | 10.3 ± 0.6 | 9.1 ± 0.4  | 33.3 ± 1.0 | b  |
| Mc-compost  | 4.0 ± 0.2 | 9.7 ± 0.5  | 10.2 ± 0.6 | 9.9 ± 0.4  | 33.8 ± 0.9 | b  |
| Champost    | 4.4 ± 0.1 | 9.1 ± 0.4  | 10.7 ± 0.6 | 10.1 ± 0.3 | 34.3 ± 0.9 | ab |
| M-dam       | 4.5 ± 0.2 | 10.1 ± 0.2 | 11.5 ± 0.5 | 11.1 ± 0.4 | 37.2 ± 0.9 | a  |
| M9/Gala     | 4.5 ± 0.1 | 8.9 ± 0.4  | 11.3 ± 0.5 | 10.3 ± 0.5 | 34.9 ± 1.2 | A  |
| M9/GalaRed  | 4.2 ± 0.2 | 10.1 ± 0.4 | 9.9 ± 0.6  | 10.7 ± 0.3 | 34.9 ± 0.7 | A  |
| G11/Gala    | 4.3 ± 0.2 | 9.8 ± 0.3  | 11.6 ± 0.6 | 10.1 ± 0.3 | 35.8 ± 0.9 | A  |
| G11/GalaRed | 4.1 ± 0.3 | 9.8 ± 0.3  | 9.9 ± 0.5  | 9.1 ± 0.4  | 33.0 ± 0.8 | A  |

± Standard error; different letters depict significance over summed years; Tukey test  $p \leq 0.05$ .

|             | Site B    |            |            |            |            |   |
|-------------|-----------|------------|------------|------------|------------|---|
|             | 2019      | 2020       | 2021       | 2022       | 2019-2022  |   |
| Control     | 2.3 ± 0.2 | 8.9 ± 0.5  | 13.8 ± 0.8 | 12.5 ± 0.7 | 37.6 ± 1.4 | a |
| Mc-compost  | 2.6 ± 0.3 | 8.8 ± 0.5  | 14.3 ± 0.7 | 12.9 ± 0.9 | 38.5 ± 1.9 | a |
| Champost    | 2.9 ± 0.3 | 9.8 ± 0.5  | 14.7 ± 0.8 | 13.9 ± 0.7 | 43.5 ± 2.7 | a |
| M-dam       | 2.2 ± 0.3 | 10.8 ± 0.3 | 16.2 ± 0.6 | 14.3 ± 0.6 | 43.5 ± 1.3 | a |
| M9/Gala     | 2.3 ± 0.2 | 9.4 ± 0.4  | 14.5 ± 0.6 | 13.6 ± 0.6 | 39.9 ± 1.3 | A |
| M9/GalaRed  |           |            |            |            |            |   |
| G11/Gala    | 2.6 ± 0.2 | 9.7 ± 0.3  | 15.0 ± 0.5 | 14.3 ± 1.2 | 42.6 ± 1.6 | A |
| G11/GalaRed |           |            |            |            |            |   |

± Standard error; different letters depict significance over summed years; Tukey test  $p \leq 0.05$ .

|            | Site C    |           |           |            |   |
|------------|-----------|-----------|-----------|------------|---|
|            | 2020      | 2021      | 2022      | 2020-2022  |   |
| Control    | 0.3 ± 0.2 | 5.7 ± 1.4 | 6.7 ± 0.7 | 12.9 ± 2.0 | a |
| Champost   | 0.6 ± 0.1 | 4.1 ± 1.0 | 6.9 ± 0.6 | 11.6 ± 1.7 | a |
| Leonardite | 0.3 ± 0.1 | 4.3 ± 0.3 | 5.7 ± 1.3 | 10.3 ± 1.6 | a |

± Standard error; different letters depict significance over summed years; Tukey test  $p \leq 0.05$ .

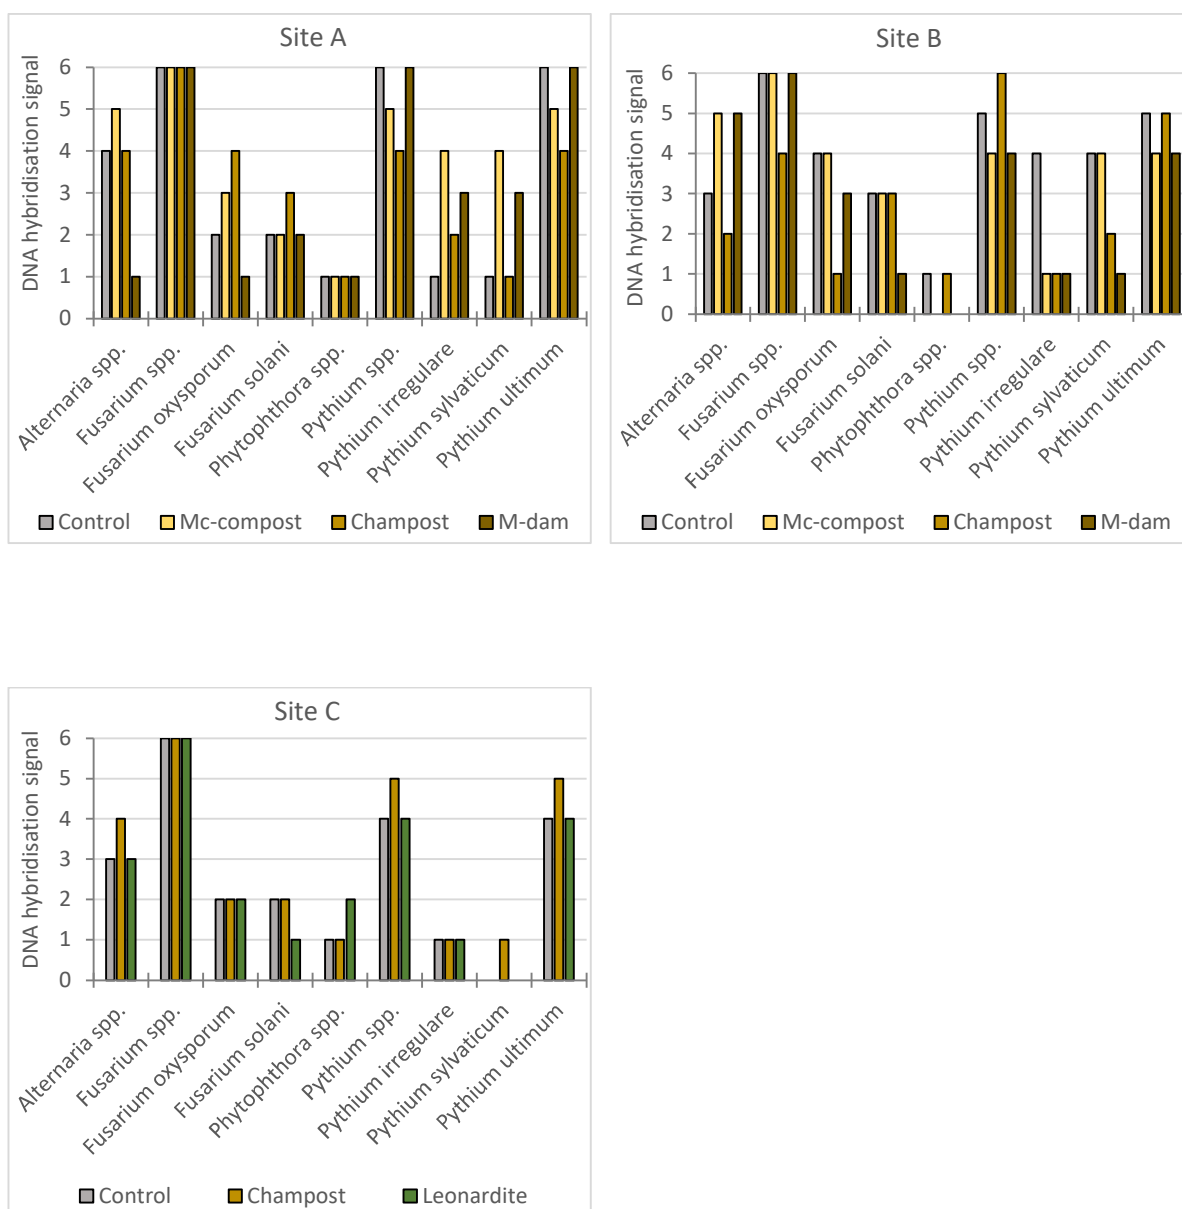

**Figure S1.** DNA Multiscan hybridisation signal intensities for predominantly fungal pathogenic microorganisms, detected in soil samples from sites A, B and C in 2022, 5 years after the soil treatments. The intensity of the DNA hybridisation signals (displayed in the respective bars) is proportional to the amount of DNA in the soil samples: 0 (not detected) to 6 (strongest).
