# Supplementary material for: Apple Growth and Yield in Replant Soils Supplemented by Organic Soil Additives
Source: MDPI journal article supplement (doi:10.3390/agronomy14040678), 2024-03-26
Supplement: s1 [file s1]

Archive with 1 entries (1 files):
- agronomy-2914031-supplementary.pdf
